# Supplementary material for: The Babesia bovis gene and promoter model: an update from full-length EST analysis
Source: PubMed Central journal article supplement (PMC4148916; doi:10.1186/1471-2164-15-678), 2014-08-13
Supplement: 12864_2013_6376_MOESM4_ESM.pdf [file 12864_2013_6376_MOESM4_ESM.pdf]

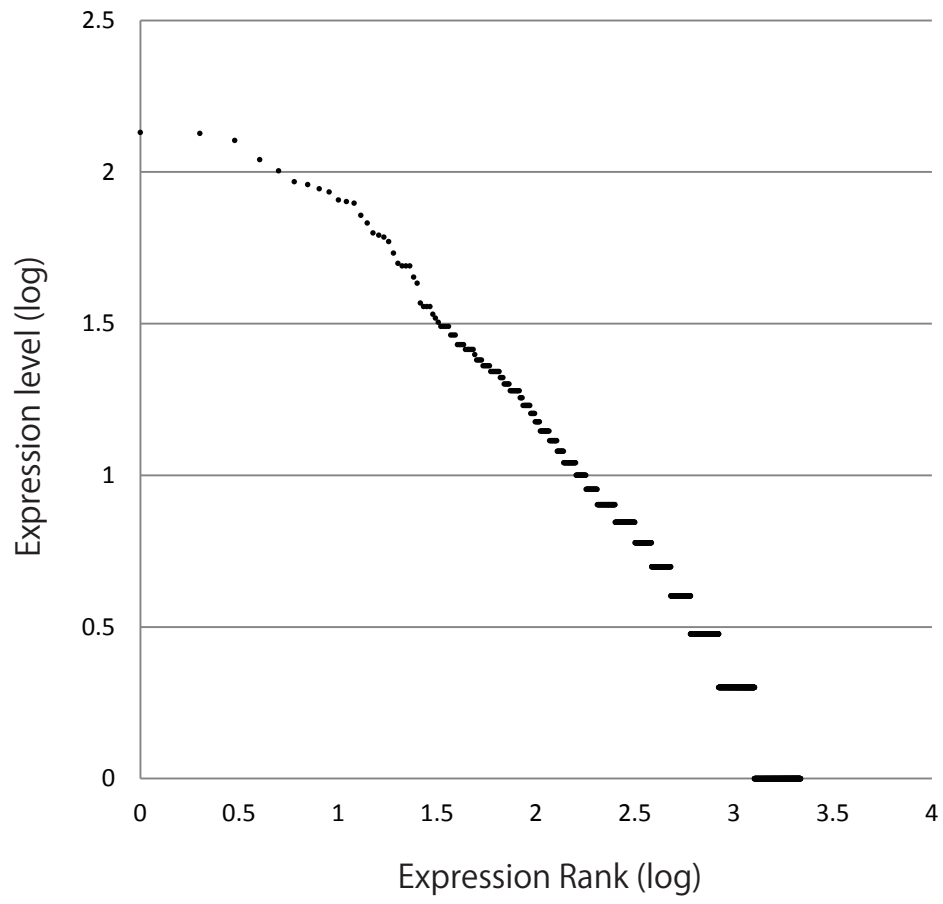

Fig. SX
